# Supplementary material for: A Qualitative Study Exploring Psychosocial Care in Inflammatory Bowel Disease: Lessons from Aotearoa New Zealand
Source: Research Square preprint supplement (doi:10.21203/rs.3.rs-7984369/v1), 2025-11-17
Supplement: Supplementary file 1 [file 83c09fcb76708242931c5631.docx]

Codebook

## Codes

| Name | Description | Files | References |
| --- | --- | --- | --- |
| Future recommendations |  | 5 | 10 |
| Follow-up appointment, regular checkins |  | 8 | 30 |
| Holistic perspective |  | 8 | 27 |
| Stepped approach | Regarding the delivery of extra support. Mode of delivery, timing/pace of delivery, individual differences, complexities. | 5 | 7 |
| Support | Includes ideas of all kinds of support that would be helpful additional to what is currently provided. On all levels: psychosocial, social, educational, practical, medical, societal. | 8 | 21 |
| Understanding symptoms |  | 6 | 19 |
| Unhelpful language, framing |  | 6 | 6 |
| Health literacy & education |  | 10 | 63 |
| Awareness, knowledge |  | 11 | 63 |
| Information overload | Sense of feeling overwhelmed with the amount of information one needs to digest upon diagnosis. Covers coping with this overload through selective learning processes, avoidance, denial, distraction, and not really understanding anything at all and hoping for the best. | 6 | 19 |
| Interesting Quotes |  | 11 | 67 |
| Intra-personal |  | 0 | 0 |
| Changes in self identity | Shift in self-identity from healthy to unhealthy/limited in some way. Self perception changes in who on is now to themselves and others. | 9 | 29 |
| Emotional factors |  | 6 | 19 |
| Acceptance |  | 11 | 46 |
| Alienation, body mistrust |  | 10 | 29 |
| Curiosity |  | 8 | 16 |
| Empathy vs Sympathy | Need for empathy but dislike sympathy | 7 | 21 |
| Fear, uncertainty, anxiety | Concerning future health outcomes of treatment efficacy and dealing with surgery. Also involves fear during times of uncertainty before diagnosis. | 7 | 39 |
| Feeling lost, confused, frustrated | All feelings are related and intertwined with one another. Some feel lost without any frustration or confusion. Some feel lost and confused. Some feel lost and frustrated. | 7 | 26 |
| Feeling understood |  | 6 | 19 |
| Grief |  | 11 | 34 |
| Hope |  | 8 | 23 |
| Mental fatigue | Mental and emotional fatigue from managing self | 6 | 9 |
| Relief |  | 7 | 16 |
| Sorrow, sadness, depression | Towards oneself and their life situation or changes associated with IBD. | 8 | 19 |
| Stress |  | 10 | 39 |
| Helplessness, lack of control | Regarding any aspect of living with IBD - in medical settings (treatment trial and error, finding a suitable HCP), personal life (becoming more reliant, keeping up with expectations of self and others), emotional/mental state (victimisation) | 12 | 57 |
| Mental health | Specifically regarding deteriorating mental health in relation to IBD diagnosis. | 11 | 42 |
| Responsibility |  | 10 | 25 |
| Retaining normality |  | 8 | 37 |
| Sense of control, self-efficacy |  | 12 | 53 |
| Sociocultural factors | Influences many factors in this journey. Cultural – gaps in understanding, how families react/are involved, lifestyle changes like diet, festivals, socials. Social – Gender norms in health behaviour, emotional expression, coping mechanisms, sense of responsibilities in family/professional life. | 4 | 23 |
| Life changes | Related to future plans, goals, visions in all areas of life (social, family, professional, health, leisure, finances). Shifting life values in current life to suit the uncertainty of the future. | 11 | 50 |
| Cost-benefit |  | 6 | 17 |
| Self-care |  | 11 | 29 |
| Self-management | The process of learning the importance of self-management. Effectively utilising skills when undergoing the treatment journey and in daily living. | 11 | 24 |
| Medical |  | 0 | 0 |
| Diagnostic experience |  | 1 | 2 |
| Confirmation |  | 9 | 20 |
| Delay |  | 10 | 20 |
| Missed |  | 8 | 24 |
| Mistrust |  | 9 | 32 |
| Information |  | 2 | 2 |
| General |  | 12 | 27 |
| Personal research |  | 10 | 25 |
| Specific guidance |  | 9 | 33 |
| Patient-provider relationship |  | 8 | 14 |
| Gastroenterologist | Or specialist in charge. | 10 | 35 |
| GP |  | 9 | 28 |
| IBD Nurse |  | 9 | 19 |
| Open communication channels, collaboration | Importance of being able to contact HCPs and communicate medical needs, preferences, and requirements. Value of collaborative decision-making throughout the patient journey. | 7 | 29 |
| Trust, reliability, advocacy, non-judgment | Relational traits within the medical context, especially in the patient provider relationship, when trying new treatments and getting medical advice. | 7 | 37 |
| Psychosocial Factors | Anything to do with self, others and psychological processes within the medical setting. | 0 | 0 |
| Isolation | Specifically regarding medical attention, care, support, guidance and access. Feeling of loneliness when dealing with practical medical issues during the pre-diagnostic and post-diagnostic stages. | 8 | 20 |
| Normalisation | Of symptoms, beliefs about potential diagnoses, perceived seriousness/severity of the unknown condition, daily routines/habits. | 7 | 16 |
| Psychosocial support | Call for psychosocial support alongside medical support. Mental health impact, social groups, raising general awareness. | 12 | 48 |
| Realising severity, seriousness |  | 8 | 29 |
| Self-advocacy |  | 8 | 26 |
| Treatment journey |  | 2 | 7 |
| Care not cure |  | 9 | 30 |
| In-patient |  | 6 | 16 |
| Medications |  | 11 | 41 |
| Adherence (medication & treatment) |  | 9 | 29 |
| Negative side effects |  | 5 | 10 |
| Treatment efficacy |  | 10 | 17 |
| Outpatient |  | 5 | 8 |
| Surgery |  | 8 | 23 |
| Symptoms |  | 11 | 31 |
| Positive Outcomes |  | 0 | 0 |
| Desire to help | Desire to help and be of service to others - a deep sense of compassion toward others suffering with IBD and a will to advocate and make a change. | 7 | 10 |
| Healthy dependance | Learning to ask for help when needed. Also learning to be mindful of over-reliance/dependance. Building own mental resources to maintain some sense of independence and self-efficacy. | 4 | 7 |
| Prioritising health | Shift in health related values, beliefs, behaviours and management for the better. | 8 | 17 |
| Relationship with self | Improved relationship with the way one related to themselves. Can imply enhanced self-compassion, care, worth, understanding, awareness, overcoming self-victimisation, empowerment. | 8 | 22 |
| Resilience | Effective coping resources and capacity in the face of life’s adversity. Gratitude, shifting to helpful perspective, acceptance, reframing unhelpful thoughts, acting in line with values. | 9 | 39 |
| Social |  | 0 | 0 |
| Barriers |  | 0 | 0 |
| Burden, guilt | Mindful of sharing burden versus being a burden on close social relations and networks. | 6 | 11 |
| Invisible illness |  | 6 | 13 |
| Public unawareness |  | 11 | 32 |
| Stigma, taboo |  | 8 | 28 |
| Groups |  | 4 | 9 |
| Comparison, Normalising, social media |  | 10 | 52 |
| Discomfort | Finding social support groups overwhelming or too confronting in early stages of diagnosis. | 4 | 9 |
| Isolation |  | 12 | 70 |
| Support |  | 3 | 3 |
| Emotional support |  | 12 | 41 |
| Practical support |  | 10 | 34 |
| Talking about IBD | Desire to be able to openly and freely talk about IBD. The positive and negative experiences when talking about IBD. | 12 | 59 |
